# Supplementary material for: Side-chain electrophilic aromatic substitution in 2-alkyloxa- and 2-alkylthiazolines initiated via σ-complex formation with super-electrophilic DNBF: a model proinsecticideElectronic supplementary information (ESI) available: the ABX analysis of the CH2-α and H2 proton region of the adduct 5-Oa. See http://www.rsc.org/suppdata/p2/b2/b201045n/
Source: Royal Society of Chemistry journal article supplement (doi:10.1039/b201045n), 2002-03-26
Supplement: b201045n.doc [file b201045n.doc]

# Supplementary data

Region of the  protons of the adduct **5-Oa** in 1H NMR spectrum.

a - without decoupling

b - under simultaneous irradiation of the CH2-N protons

c - analysis of the CH2- H7 system by the subspectra' method.

In the adduct **5-Oa**, the  and H7 protons constitute an ABX system due to the diastereotopic C7 center. The high-field signal of the AB part of this system is complicated by a supplementary coupling (of the homoallylic 5J type ~ 1.3 Hz) with the methylenic protons (CH2-N) resulting in the splitting of the four lines into triplet (cf. figure a). This AB part was analyzed : a = 885.4 Hz, b = 850.7 Hz, JAB = -14.8 Hz, JAX = 4.8 Hz, JBX = 3.8 Hz by the sub-spectra method using the four frequencies of the low-field part and the central frequencies of the four triplet of the high-field part.
