# Supplementary figures and images for: Side-chain electrophilic aromatic substitution in 2-alkyloxa- and 2-alkylthiazolines initiated via σ-complex formation with super-electrophilic DNBF: a model proinsecticideElectronic supplementary information (ESI) available: the ABX analysis of the CH2-α and H2 proton region of the adduct 5-Oa. See http://www.rsc.org/suppdata/p2/b2/b201045n/
Source: Royal Society of Chemistry journal article supplement (doi:10.1039/b201045n), 2002-03-26

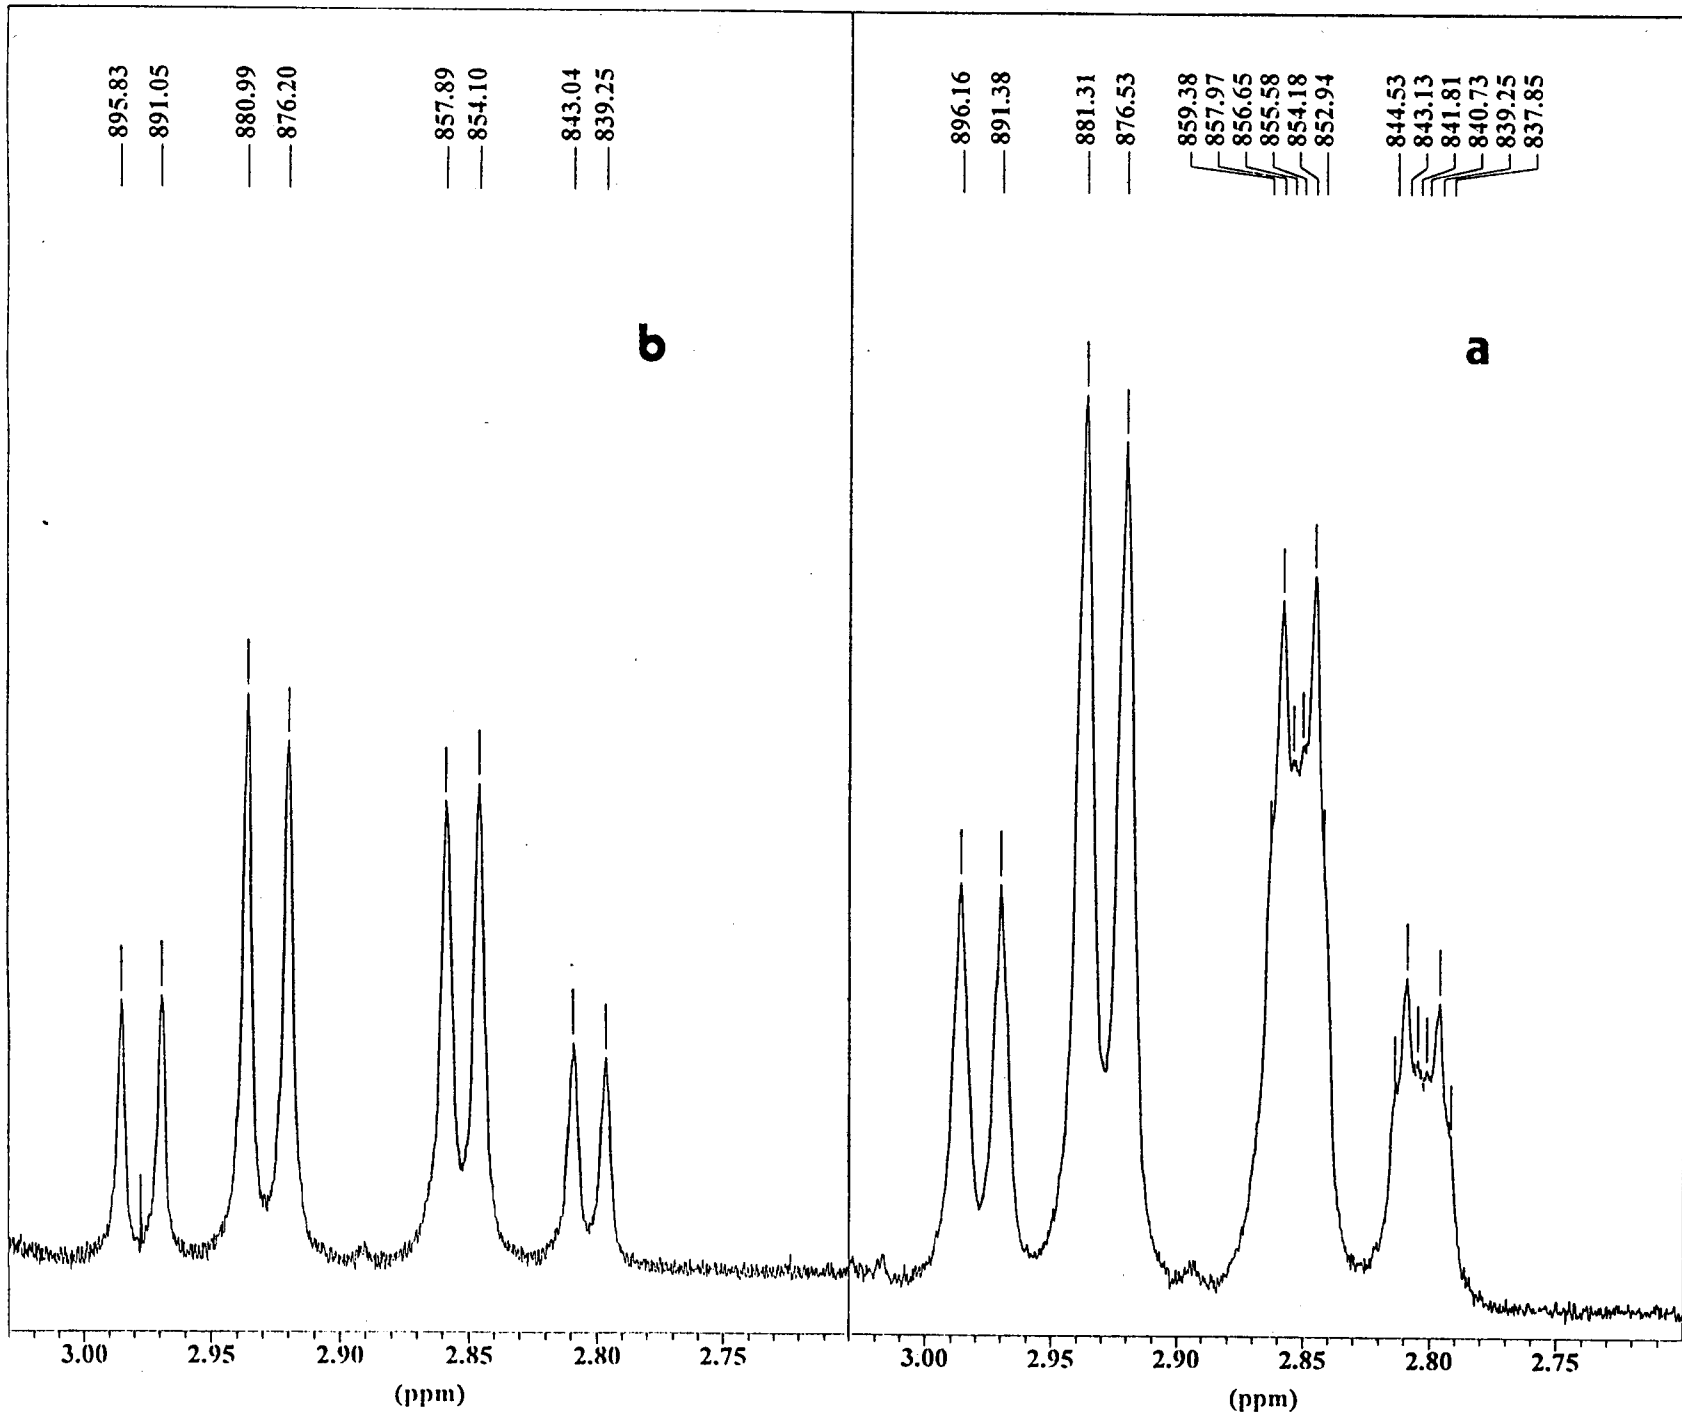

Supplement: b201045n.pdf [file b201045n.pdf]
